# Supplementary material for: Determination of Lipoxygenase, CYP450, and Non-Enzymatic Metabolites of Arachidonic Acid in Essential Hypertension and Type 2 Diabetes
Source: MDPI journal article supplement (doi:10.3390/metabo12090859), 2022-09-13
Supplement: s1 [file s1]

**Supplementary Table S1.** LC-MS/MS parameters for DHETs, EETs, HETEs and internal standards.

| Analyte                    | Mass transition |              | Dwell Time<br>(msec) | MS parameters      |    |                 | Adduct             | Retention<br>time (min) |
|----------------------------|-----------------|--------------|----------------------|--------------------|----|-----------------|--------------------|-------------------------|
|                            | m/z<br>(MS1)    | m/z<br>(MS3) |                      | Q1 Pre Bias<br>(V) | CE | Q3 Pre Bias (V) |                    |                         |
| 14,15-DHET                 | 337.20          | 207.20       | 17                   | 12                 | 18 | 15              | [M-H] <sup>-</sup> | 4.167                   |
| 11,12-DHET                 | 337.20          | 167.10       | 17                   | 12                 | 18 | 12              | [M-H] <sup>-</sup> | 4.395                   |
| 8,9-DHET                   | 337.20          | 127.20       | 17                   | 12                 | 20 | 14              | [M-H] <sup>-</sup> | 4.489                   |
| 5,6-DHET                   | 337.20          | 145.05       | 17                   | 12                 | 16 | 11              | [M-H] <sup>-</sup> | 4.840                   |
| 14,15-EET                  | 319.00          | 219.25       | 17                   | 17                 | 12 | 16              | [M-H] <sup>-</sup> | 5.704                   |
| 11,12-EET                  | 319.20          | 208.10       | 10                   | 11                 | 12 | 11              | [M-H] <sup>-</sup> | 5.941                   |
| 8,9-EET                    | 319.20          | 155.00       | 10                   | 23                 | 12 | 11              | [M-H] <sup>-</sup> | 5.990                   |
| 20-HETE                    | 319.00          | 245.15       | 38                   | 14                 | 17 | 20              | [M-H] <sup>-</sup> | 4.755                   |
| 19-HETE                    | 319.00          | 231.35       | 38                   | 16                 | 17 | 13              | [M-H] <sup>-</sup> | 4.697                   |
| 15-HETE                    | 319.20          | 219.15       | 38                   | 11                 | 13 | 11              | [M-H] <sup>-</sup> | 5.236                   |
| 12-HETE                    | 319.20          | 179.15       | 38                   | 30                 | 14 | 30              | [M-H] <sup>-</sup> | 5.379                   |
| 11-HETE                    | 319.20          | 167.15       | 38                   | 15                 | 16 | 12              | [M-H] <sup>-</sup> | 5.263                   |
| 8-HETE                     | 319.20          | 155.10       | 38                   | 11                 | 15 | 11              | [M-H] <sup>-</sup> | 5.401                   |
| 5-HETE                     | 319.20          | 114.90       | 17                   | 26                 | 14 | 30              | [M-H] <sup>-</sup> | 5.744                   |
| 14,15-DHET-d <sub>11</sub> | 348.10          | 207.10       | 10                   | 17                 | 18 | 15              | [M-H] <sup>-</sup> | 4.213                   |
| 14,15-EET-d <sub>11</sub>  | 330.10          | 219.25       | 10                   | 16                 | 12 | 16              | [M-H] <sup>-</sup> | 5.642                   |
| 15-HETE-d <sub>8</sub>     | 327.10          | 226.25       | 10                   | 16                 | 14 | 16              | [M-H] <sup>-</sup> | 5.178                   |

**Supplementary Table S2.** Comparison of the slopes of the calibration curves according to the matrix.

| Analyte    | Plasma            | PBS                            | BSA                             |
|------------|-------------------|--------------------------------|---------------------------------|
| 14,15-DHET | 0,00216 ± 0,00031 | 0,00238 ± 0,00028              | 0,00209 ± 0,00037               |
| 11,12-DHET | 0,00253 ± 0,00062 | 0,00253 ± 0,00029              | 0,00194 ± 0,00026 <sup>*†</sup> |
| 8,9-DHET   | 0,00081 ± 0,00013 | 0,00077 ± 0,00009              | 0,00050 ± 0,00005 <sup>*†</sup> |
| 5,6-DHET   | 0,00170 ± 0,00034 | 0,00093 ± 0,00005 <sup>*</sup> | 0,00062 ± 0,00008 <sup>*‡</sup> |
| 14,15-EET  | 0,0186 ± 0,0018   | 0,0167 ± 0,0027                | 0,0130 ± 0,0008 <sup>*‡</sup>   |
| 11,12-EET  | 0,00044 ± 0,00017 | 0,00110 ± 0,00015 <sup>*</sup> | 0,00088 ± 0,00009 <sup>*‡</sup> |
| 8,9-EET    | 0,00035 ± 0,00025 | 0,00133 ± 0,00026 <sup>*</sup> | 0,0007 ± 0,00017 <sup>*</sup>   |
| 20-HETE    | 0,00043 ± 0,00003 | 0,00061 ± 0,00008 <sup>*</sup> | 0,00054 ± 0,00008 <sup>*</sup>  |
| 19-HETE    | 0,00051 ± 0,00008 | 0,00065 ± 0,00013 <sup>*</sup> | 0,00059 ± 0,00011               |
| 15-HETE    | 0,00220 ± 0,00024 | 0,00266 ± 0,00035              | 0,00242 ± 0,00050               |
| 12-HETE    | 0,00246 ± 0,00077 | 0,00307 ± 0,00048              | 0,00314 ± 0,00062               |
| 11-HETE    | 0,00858 ± 0,00092 | 0,00996 ± 0,00164              | 0,00987 ± 0,00200               |
| 8-HETE     | 0,00171 ± 0,00012 | 0,00208 ± 0,00012              | 0,00174 ± 0,00002               |
| 5-HETE     | 0,00155 ± 0,00035 | 0,00227 ± 0,00036 <sup>*</sup> | 0,00183 ± 0,00006               |

Data are expressed as mean ± standard deviation. \* P < 0.05 vs. plasma †P < 0.05 vs. PBS, ‡P < 0.05 vs. BSA. BSA: bovine serum albumin, PBS: phosphate-buffered saline.

**Supplementary Table S3.** Recovery rate of PBS spiked with 10 ng/mL according to deproteinization tube

| Analyte       | Standard eppendorf<br>(Area) | Chromacol<br>(Area)      | Lobind® eppendorf<br>(Area) |
|---------------|------------------------------|--------------------------|-----------------------------|
| 14,15-DHET    | 10500092 ± 2434693 (23%)     | 17816564 ± 3535152 (20%) | 24902899 ± 4714984 (19%)    |
| 11,12-DHET    | 5778393 ± 557955 (10%)       | 9422037 ± 1638894 (17%)  | 11407911 ± 3074228 (27%)    |
| 8,9-DHET      | 1403792 ± 260491 (19%)       | 2668709 ± 414299 (16%)   | 3328670 ± 541536 (16%)      |
| 5,6-DHET      | 1554017 ± 184718 (12%)       | 2823235 ± 487060 (17%)   | 2802168 ± 383358 (14%)      |
| 14,15-EET     | 5076407 ± 448163 (9%)        | 11754670 ± 1926462 (16%) | 8352584 ± 1197625 (14%)     |
| 11,12-EET     | 385158 ± 65824 (17%)         | 899617 ± 328555 (37%)    | 677568 ± 205449 (30%)       |
| 8,9-EET       | 277662 ± 78668 (28%)         | 678557 ± 406847 (60%)    | 799683 ± 228336 (29%)       |
| 20-HETE       | 404586 ± 45141 (11%)         | 825689 ± 140290 (17%)    | 832081 ± 140737 (17%)       |
| 19-HETE       | 526012 ± 27857 (5%)          | 1002883 ± 183593 (18%)   | 831065 ± 102427 (11%)       |
| 15-HETE       | 978295 ± 78624 (8%)          | 2694306 ± 369284 (14%)   | 2858493 ± 69104 (2%)        |
| 12-HETE       | 1215713 ± 69371 (6%)         | 2649338 ± 638721 (24%)   | 3339454 ± 434012 (13%)      |
| 11-HETE       | 3007745 ± 361534 (12%)       | 7796443 ± 1608635 (21%)  | 9073193 ± 1114071 (12%)     |
| 8-HETE        | 1478025 ± 78921 (5%)         | 3457326 ± 721683 (21%)   | 3947060 ± 240355 (6%)       |
| 5-HETE        | 1016582 ± 86904 (9%)         | 2537499 ± 509498 (20%)   | 2778363 ± 304264 (11%)      |
| 14,15-DHETd11 | 9077321 ± 916723 (10%)       | 11146754 ± 2299663 (21%) | 12314215 ± 4377150 (36%)    |
| 14,15-EETd11  | 1217819 ± 99085 (8%)         | 1825700 ± 325808 (18%)   | 1082065 ± 21066 (2%)        |
| 15-HETEd8     | 1612311 ± 339478 (21%)       | 2886719 ± 312984 (11%)   | 2488547 ± 271853 (11%)      |

*Data are expressed as mean ± s.d. (CV%) performed in triplicates. CV: coefficient of variation; s.d.: standard deviation.*

**Supplementary Table S4.** Comparison between lithium heparinate and EDTA sampling on oxylipins concentrations

| Analyte    | Heparine (pg/mL) | EDTA (pg/mL) | Heparine-to-EDTA ratio (CV%) |
|------------|------------------|--------------|------------------------------|
| 14,15-DHET | 196 ± 71         | 200 ± 67     | 0.98 ± 0.07 (7.2%)           |
| 11,12-DHET | 204 ± 88         | 198 ± 76     | 1.05 ± 0.23 (22.3%)          |
| 8,9-DHET   | 79 ± 23          | 81 ± 24      | 1.00 ± 0.26 (26%)            |
| 5,6-DHET   | 131 ± 39         | 126 ± 42     | 1.06 ± 0.19 (18%)            |
| 14,15-EET  | 27 ± 11          | 20 ± 16      | 1.98 ± 1.32 (66%)            |
| 11,12-EET  | 30 ± 7           | 26 ± 15      | 1.51 ± 0.99 (65%)            |
| 8,9-EET    | 48 ± 4           | 44 ± 6       | 1.09 ± 0.15 (13%)            |
| 20-HETE    | 143 ± 56         | 132 ± 69     | 1.13 ± 0.26 (23%)            |
| 19-HETE    | 105 ± 35         | 119 ± 36     | 0.88 ± 0.06 (7%)             |
| 15-HETE    | 314 ± 83         | 320 ± 97     | 0.99 ± 0.11 (11%)            |
| 12-HETE    | 1672 ± 1222      | 689 ± 363    | 2.73 ± 2.59 (95%)            |
| 11-HETE    | 74 ± 17          | 77 ± 21      | 0.98 ± 0.17 (17%)            |
| 8-HETE     | 75 ± 14          | 71 ± 16      | 1.06 ± 0.08 (7%)             |
| 5-HETE     | 168 ± 13         | 132 ± 49     | 1.50 ± 0.81 (54%)            |

*Data are expressed as mean ± s.d. (CV%) performed in 5 replicates. CV: coefficient of variation; s.d.: standard deviation.*
